# Supplementary material for: PKR-Mediated Phosphorylation of eIF2a and CHK1 Is Associated with Doxorubicin-Mediated Apoptosis in HCC1143 Triple-Negative Breast Cancer Cells
Source: MDPI journal article supplement (doi:10.3390/ijms232415872), 2022-12-14
Supplement: s1 [file s1]

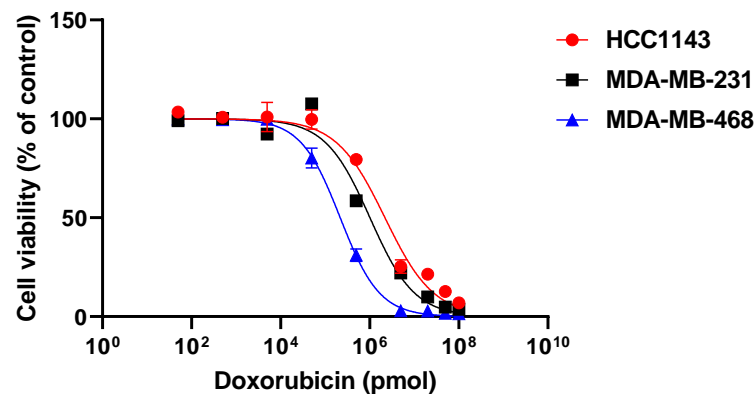

**Figure S1.** Sensitivity of various triple negative breast cancer cells to doxorubicin. Three types of TNBC (HCC1143, MDA-MB-231, MDA-MB-468) were treated with doxorubicin at various concentrations for 48 h and MTT assay was performed to measure cell viability.

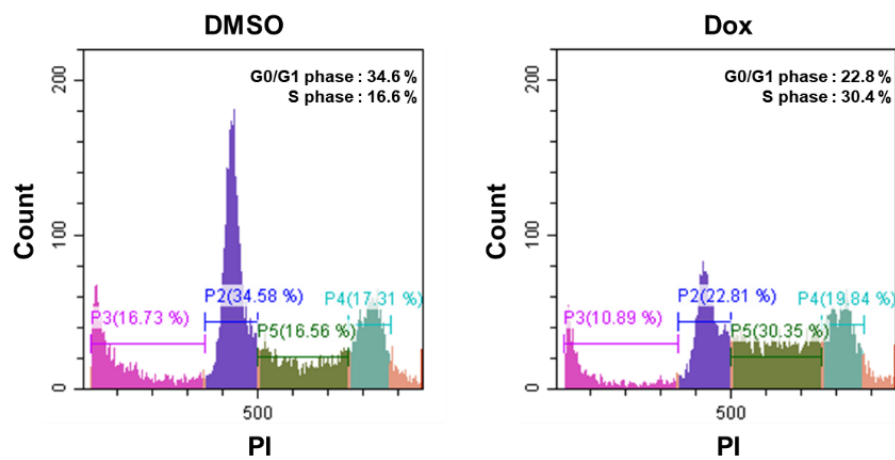

**Figure S2.** Doxorubicin-mediated DNA damage in HCC1143 triple-negative breast cancer cells. Cells were treated with DMSO (control) or 1.5  $\mu$ M doxorubicin for 24 h, stained with PI, and subjected to cell cycle analysis. Percentages of cells counted in G0/G1 phase and S phase are indicated by bars in the histogram.

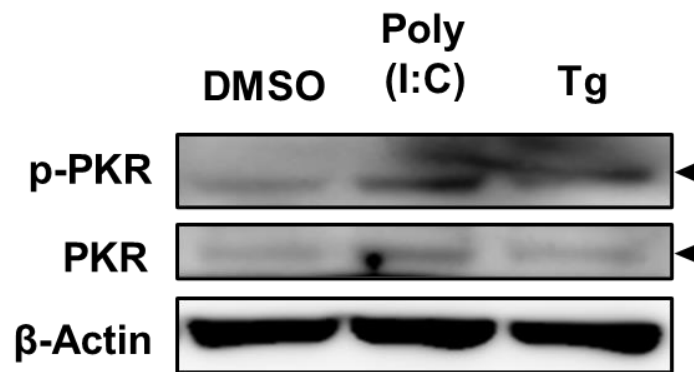

**Figure S3.** Activation of PKR-mediated eukaryotic initiation factor 2 alpha (eIF2 $\alpha$ ) in HCC1143 cells. Cells treated with DMSO (control), 1.5  $\mu$ M doxorubicin, 20  $\mu$ M Poly(I:C), and 0.2  $\mu$ M Tg for 24 h were analyzed via immunoblotting using antibodies against p-PKR, PKR, and  $\beta$ -Actin.

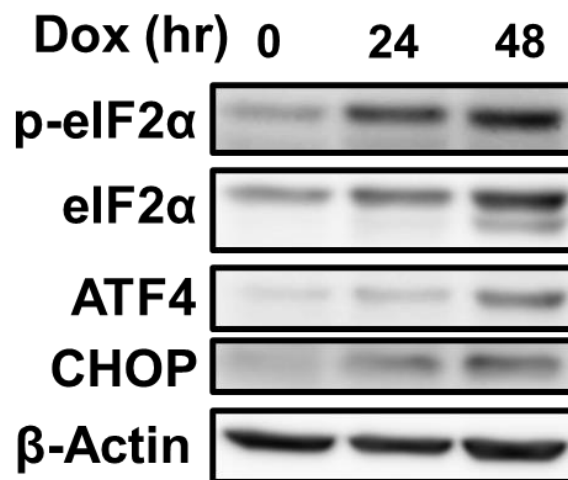

**Figure S4.** Doxorubicin-mediated eIF2 $\alpha$ /ATF4/CHOP signaling in HCC1143 cells. Cells were treated with 1.5  $\mu$ M doxorubicin for the indicated time period and analyzed via immunoblotting using specific antibodies against p-eIF2 $\alpha$ , eIF2 $\alpha$ , ATF4, CHOP, and  $\beta$ -Actin.
